# Supplementary material
Source: PubMed Central journal article supplement (PMC6727608)
Supplement: mp8b01169_si_001.pdf [file mp8b01169_si_001.pdf]

## Supporting Information to:

## Noninvasive and Quantitative Monitoring of the Distributions and Kinetics of MicroRNA-targeting Molecules *In Vivo* by Positron Emission Tomography

Jussi Mäkilä<sup>1</sup>, Anu Kiviniemi<sup>2</sup>, Tiina Saanijoki<sup>3</sup>, Heidi Liljenbäck<sup>3,4</sup>, Meeri Käkelä<sup>3</sup>, Satish Jadhav<sup>2,6</sup>, Päivi Poijärvi-Virta<sup>2</sup>, Harri Lönnberg<sup>2</sup>, Tiina Laitala-Leinonen<sup>1</sup>, Pasi Virta<sup>2</sup>, and Anne Roivainen<sup>3,4,5\*</sup>

<sup>1</sup> Skeletal Biology Consortium, Department of Cell Biology and Anatomy, University of Turku, Turku, Finland

<sup>2</sup> Department of Chemistry, University of Turku, Turku, Finland

<sup>3</sup> Turku PET Centre, University of Turku, Turku, Finland

<sup>4</sup> Turku Center for Disease Modelling, University of Turku, Turku, Finland

<sup>5</sup> Turku PET Centre, Turku University Hospital, Turku, Finland

<sup>6</sup> Department of Cellular and Molecular Medicine, School of Medicine, University of California, San Diego, La Jolla, CA 92093, USA

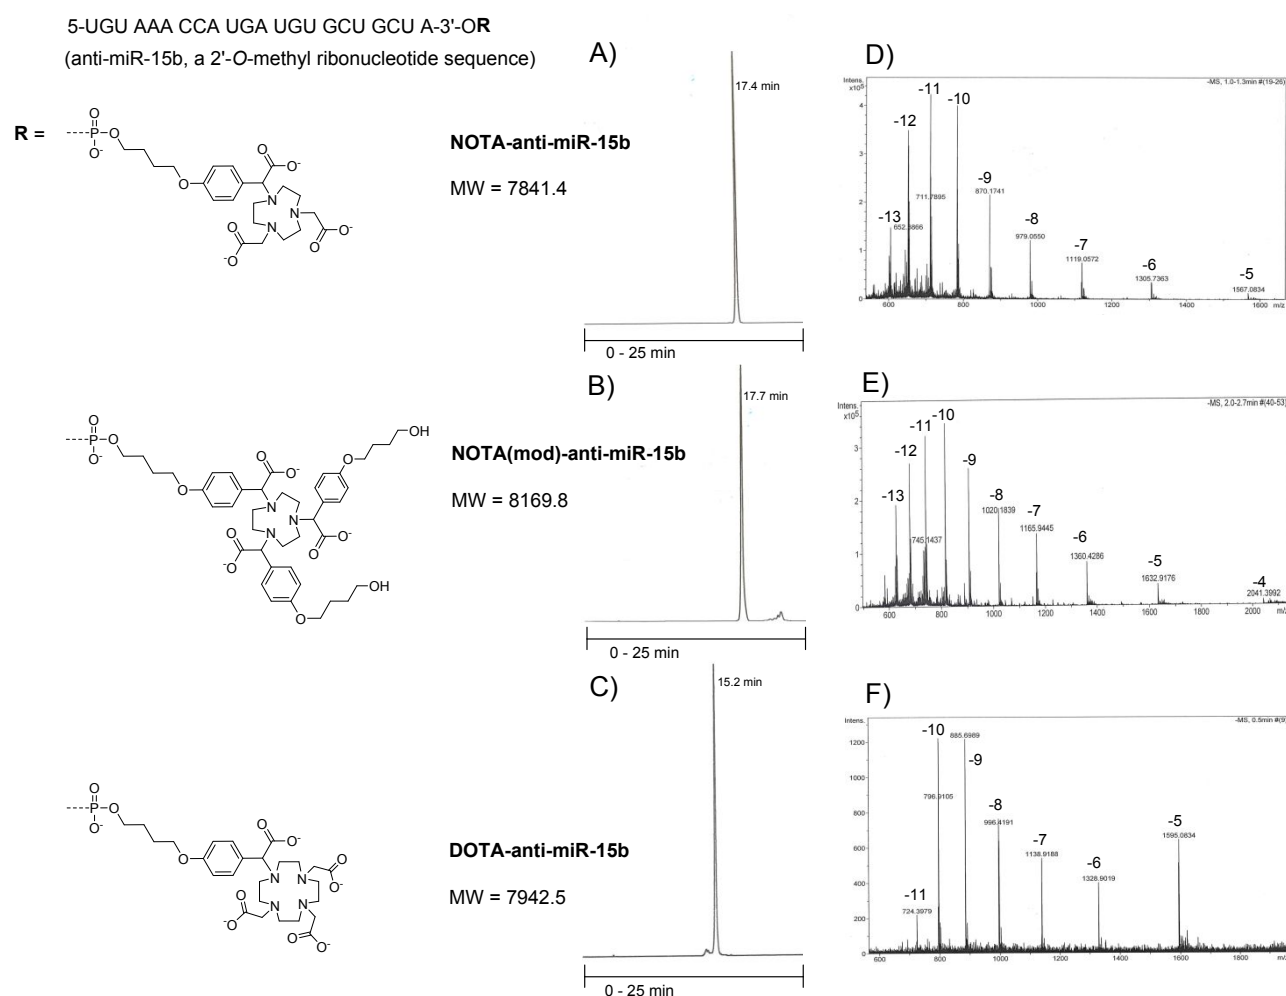

**Figure S1.** Representative RP HPLC chromatograms (A-C) and MS (ESI-TOF) spectra (D-F) of the oligonucleotides (**NOTA-**, **NOTA(mod)-** and **DOTA-anti-miR-15b**). RP HPLC conditions: An analytical R HPLC column (C18, 250 × 4.6 mm, 5 μm), detection at λ 260 nm, flow rate 1.0 mL min<sup>-1</sup>, A gradient elution from 20 to 60% MeCN in 0.1 mol L<sup>-1</sup> aqueous triethyl ammonium acetate over 25 min. Observed masses for **NOTA-**

**anti-miR-15b:**  $5 \times 1567.1 [(M-5H)/5]^{5-} + 5 \times 1.01 (H^+) = 7840.5$ , for **NOTA(mod)-anti-miR-15b:**  $4 \times 2041.4 [(M-4H)/4]^{4-} + 4 \times 1.01(H^+) = 8169.6$ , for **DOTA-anti-miR-15b:**  $5 \times 1595.1[(M-6H+K)/6]^{6-} - 39.1 (K^+) + 6 \times 1.01 (H^+) = 7942.4$ .

**Table S1.** MS (ESI-TOF) data of the oligonucleotides

| Oligonucleotide              | NOTA-<br>anti-miR-15b | NOTA(mod)-<br>anti-miR-15b | DOTA-<br>anti-miR-15b | NOTA-<br>anti-miR-15b<br>(2SBS) | NOTA-<br>anti-miR-15b<br>(scr) | NOTA-<br>anti-<br>miR-34 | NOTA-<br>T6 |
|------------------------------|-----------------------|----------------------------|-----------------------|---------------------------------|--------------------------------|--------------------------|-------------|
| Observed<br>molecular mass   | 7840.5                | 8169.6                     | 7942.4*               | 7863.8                          | 7840.6                         | 7828.4                   | 2291.5      |
| Calculated<br>molecular mass | 7841.4                | 8169.8                     | 7942.5*               | 7864.4                          | 7841.4                         | 7828.5                   | 2291.7      |

Observed masses calculated from  $[(M-nH)/n]^n$ , \* observed as potassium adducts, cf. the spectra in Figure S1

**Table S2.** Radioactivity concentration in rat blood and plasma at 60 min after intravenous injection

| Tracer                                        | Blood (SUV) | Blood cells (SUV) | Plasma (SUV) | Plasma/Blood ratio |
|-----------------------------------------------|-------------|-------------------|--------------|--------------------|
| [ <sup>68</sup> Ga]Ga-NOTA-anti-miR-15b       | 0.34 ± 0.19 | 0.27±0.15         | 0.62 ± 0.32  | 1.82 ± 0.09        |
| [ <sup>68</sup> Ga]Ga-NOTA(mod)-anti-miR-15b  | 0.16 ± 0.04 | 0.12±0.03         | 0.29 ± 0.07  | 1.75 ± 0.02        |
| [ <sup>68</sup> Ga]Ga-DOTA-anti-miR-15b       | 0.78 ± 0.56 | 0.63±0.45         | 1.41 ± 1.01  | 1.81 ± 0.05        |
| [ <sup>68</sup> Ga]Ga-NOTA-anti-miR-15b(2SBS) | 0.14 ± 0.02 | 0.10±0.01         | 0.23 ± 0.02  | 1.67 ± 0.18        |
| [ <sup>68</sup> Ga]Ga-NOTA- anti-miR-15b(scr) | 0.14 ± 0.02 | 0.12±0.01         | 0.27 ± 0.02  | 1.86 ± 0.18        |
| [ <sup>68</sup> Ga]Ga-NOTA- anti-miR-34       | 0.23 ± 0.07 | 0.19±0.05         | 0.42 ± 0.12  | 1.83 ± 0.01        |
| [ <sup>68</sup> Ga]Ga-NOTA-T6                 | 0.25 ± 0.11 | 0.19±0.08         | 0.45 ± 0.16  | 1.76 ± 0.15        |
| [ <sup>68</sup> Ga]Ga-NOTA                    | 0.23 ± 0.05 | 0.18±0.04         | 0.42 ± 0.11  | 1.87 ± 0.09        |
| Mean ± SD                                     |             |                   |              | 1.80 ± 0.06        |

Plasma/blood ratio was used in correcting blood time-activity curve to plasma activity curve. Units used in table are standardized uptake values (SUV, g/mL).

**Table S3.** *Ex vivo* biodistribution of studied molecules in rats at 60 min after intravenous injection

| Tissue                  | [ <sup>68</sup> Ga]Ga-<br>NOTA-<br>anti-miR-15b | [ <sup>68</sup> Ga]Ga-<br>NOTA(mod)-<br>anti-miR-15b <sup>a</sup> | [ <sup>68</sup> Ga]Ga-<br>DOTA-<br>anti-miR-15b <sup>a</sup> | [ <sup>68</sup> Ga]Ga-<br>NOTA-<br>anti-miR-15b(2SBS) | [ <sup>68</sup> Ga]Ga-<br>NOTA-<br>anti-miR-15b(scr) | [ <sup>68</sup> Ga]Ga-<br>NOTA-<br>anti-miR-34 | [ <sup>68</sup> Ga]Ga-<br>NOTA-<br>T6 | [ <sup>68</sup> Ga]Ga-<br>NOTA |
|-------------------------|-------------------------------------------------|-------------------------------------------------------------------|--------------------------------------------------------------|-------------------------------------------------------|------------------------------------------------------|------------------------------------------------|---------------------------------------|--------------------------------|
| Adrenal glands          | 0.25±0.07                                       | 0.21±0.04                                                         | 0.35±0.24                                                    | 0.15±0.03                                             | 0.19±0.05                                            | 0.20±0.03                                      | 0.12±0.05                             | 0.14±0.04                      |
| Bone                    | 0.40±0.18                                       | 0.57±0.10                                                         | 0.39±0.11                                                    | 0.28±0.03                                             | 0.28±0.01                                            | 0.27±0.05                                      | 0.06±0.01                             | 0.04±0.02                      |
| Bone marrow             | 0.67±0.05                                       | 1.36±0.18                                                         | 0.73±0.27                                                    | 0.37±0.07                                             | 0.72±0.07                                            | 0.35±0.06                                      | 0.09±0.02                             | 0.06±0.02                      |
| Brain                   | 0.02±0.00                                       | 0.01±0.00                                                         | 0.03±0.03                                                    | 0.01±0.00                                             | 0.01±0.00                                            | 0.01±0.00                                      | 0.02±0.01                             | 0.02±0.01                      |
| BAT                     | 0.21±0.05                                       | 0.25±0.03                                                         | 0.23±0.12                                                    | 0.13±0.03                                             | 0.14±0.02                                            | 0.14±0.04                                      | 0.09±0.03                             | 0.08±0.01                      |
| Heart                   | 0.18±0.06                                       | 0.21±0.02                                                         | 0.27±0.16                                                    | 0.08±0.01                                             | 0.12±0.01                                            | 0.12±0.03                                      | 0.10±0.03                             | 0.08±0.02                      |
| Intestines <sup>b</sup> | 0.22±0.03                                       | 0.35±0.06                                                         | 0.25±0.12                                                    | 0.10±0.01                                             | 0.19±0.02                                            | 0.15±0.03                                      | 3.12±2.03                             | 0.50±0.30                      |
| Intestines <sup>c</sup> | 0.38±0.11                                       | 0.38±0.01                                                         | 0.32±0.13                                                    | 0.17±0.01                                             | 0.29±0.03                                            | 0.24±0.06                                      | 3.22±1.47                             | 0.29±0.20                      |
| Kidneys                 | 178.20±102.96                                   | 100.26±6.68                                                       | 83.13±23.37                                                  | 63.01±30.15                                           | 141.05±31.11                                         | 150.25±21.68                                   | 5.48±2.06                             | 3.97±1.23                      |
| Liver                   | 1.72±0.71                                       | 3.38±0.71                                                         | 2.50±0.63                                                    | 0.84±0.19                                             | 1.09±0.02                                            | 0.94±0.15                                      | 1.11±0.42                             | 0.56±0.07                      |
| Lungs                   | 0.37±0.09                                       | 0.42±0.13                                                         | 0.64±0.42                                                    | 0.18±0.01                                             | 0.21±0.02                                            | 0.24±0.05                                      | 0.29±0.03                             | 0.24±0.06                      |
| Muscle                  | 0.07±0.01                                       | 0.07±0.02                                                         | 0.08±0.04                                                    | 0.05±0.01                                             | 0.04±0.00                                            | 0.05±0.01                                      | 0.04±0.01                             | 0.04±0.01                      |
| Pancreas                | 0.33±0.07                                       | 0.36±0.03                                                         | 0.27±0.06                                                    | 0.15±0.02                                             | 0.37±0.08                                            | 0.19±0.04                                      | 0.34±0.11                             | 0.10±0.02                      |
| Salivary glands         | 0.43±0.09                                       | 0.48±0.14                                                         | 0.35±0.16                                                    | 0.19±0.02                                             | 0.57±0.05                                            | 0.24±0.05                                      | 0.09±0.03                             | 0.10±0.02                      |
| Skin                    | 0.29±0.09                                       | 0.31±0.08                                                         | 0.24±0.06                                                    | 0.34±0.09                                             | 0.24±0.03                                            | 0.36±0.11                                      | 0.18±0.05                             | 0.14±0.04                      |
| Spleen                  | 0.86±0.57                                       | 1.85±0.69                                                         | 1.49±0.63                                                    | 0.38±0.08                                             | 0.33±0.04                                            | 0.38±0.11                                      | 1.59±0.68                             | 0.26±0.09                      |
| Urine                   | 10.94±2.84                                      | 19.08±11.67                                                       | 15.66±8.51                                                   | 18.10±7.64                                            | 40.13±15.83                                          | 22.12±4.11                                     | 146.82±58.74                          | 208.51±47.32                   |
| WAT                     | 0.06±0.02                                       | 0.07±0.04                                                         | 0.05±0.02                                                    | 0.04±0.01                                             | 0.04±0.00                                            | 0.04±0.01                                      | 0.50±0.38                             | 0.04±0.02                      |

Units used in table are standardized uptake values (SUV, mean±SD, n=4 except for [<sup>68</sup>Ga]Ga-NOTA(mod)-anti-miR-15b n=3). <sup>a</sup> includes two females, all other rats are males; <sup>b</sup> with content; <sup>c</sup> without content; BAT, brown adipose tissue; WAT, white adipose tissue.
